1 **Heterogeneity and developmental dynamics of LYVE-1 perivascular macrophages**  
2 **distribution in the mouse brain**

3

4 **Running headline: Brain perivascular macrophages pattern diversity**

5

6 **Marie Karam<sup>1</sup>, Guy Malkinson<sup>1#</sup> and Isabelle Brunet<sup>1#\*</sup>**

7 **1 Center for Interdisciplinary Research in Biology (CIRB), College de France, CNRS,**

8 **INSERM, Université PSL, Paris, France.**

9

10 **# These authors contributed equally to this work**

11

12 **\* Author for correspondence: Isabelle Brunet**

13 **Email: [isabelle.brunet@college-de-france.fr](mailto:isabelle.brunet@college-de-france.fr)**

14

15

16 **Abstract**

17 Brain perivascular macrophages (PVMs) belong to border-associated macrophages.  
18 PVMs are situated along blood vessels in the Virchow-Robin space and are thus found at  
19 a unique anatomical position between the endothelium and the parenchyma. Owing to  
20 their location and phagocytic capabilities, PVMs are regarded as important components  
21 that regulate various aspects of brain physiology in health and pathophysiological states.  
22 Here, used LYVE-1 to identify PVMs in the mouse brain. We used brain-tissue sections  
23 and cleared whole-brains to learn how they are distributed within the brain and across  
24 different developmental postnatal stages. We find that LYVE-1<sup>+</sup> PVMs associate with the  
25 vasculature in a brain-region-dependent manner, where the hippocampus shows the  
26 highest density of LYVE-1<sup>+</sup> PVMs. We show that their postnatal distribution is  
27 developmentally dynamic and peaks at P10-P20 depending on the brain region. We  
28 further demonstrate that their density is reduced in the APP/PS1 mouse model of  
29 Alzheimer's Disease. In conclusion, our results show an unexpected heterogeneity and  
30 dynamics of LYVE-1<sup>+</sup> PVMs, and support an important role for this population of PVMs  
31 during development and in regulating brain functions in steady-state and disease  
32 conditions.

33

34 **Keywords:** Brain, Endothelium, LYVE-1, Perivascular macrophages, Tissue clearing.

35

36

## 37 **Introduction**

38 Continuous brain activity is crucial in order to support body demands and needs. Such  
39 extensive activity requires constant and considerable supply of oxygen and nutrients, a  
40 task which is carried out by the brain's vascular network. However, it also generates an  
41 extensive amount of metabolites and by-products that must be cleared away from the  
42 brain tissue in order to ensure a stable physiological environment<sup>1</sup>. Exchange of  
43 molecules across the vascular membrane between the vessel lumen and the parenchyma  
44 is tightly regulated because of the blood brain barrier<sup>2</sup>, thus a critical limitation in terms of  
45 waste-clearance is imposed. Currently, several mechanisms account for waste-clearance  
46 from the brain. The first are the meningeal lymphatic vessels (mLVs), which are part of  
47 the endothelial lymphatic system<sup>3,4</sup>. Waste in the brain itself is cleared by a different  
48 system, the glymphatic system, which is a paravascular system responsible for the  
49 exchange of cerebrospinal fluid (CSF) into and out of the brain around the vessels, in the  
50 Virchow-Robin space<sup>5</sup>. An additional clearance route along arterial perivascular spaces  
51 has also been demonstrated<sup>6</sup>. Nonetheless, it remains largely unknown how physiological  
52 homeostasis is maintained both globally and locally in the brain<sup>1, 7</sup>.

53 Brain perivascular macrophages (PVMs) are a subset of border-associated-macrophages  
54 (BAMs, also known as CNS-associated-macrophages, CAMs) which also comprise the  
55 meningeal macrophages (MMs) and choroid-plexus macrophages (CPMs)<sup>8, 9</sup>. PVMs are  
56 found in the Virchow-Robin space around the vessel wall, at a strategical anatomical  
57 position between the endothelium and the parenchyma, and are thus regarded as critical  
58 in linking peripheral blood-borne signals and the CNS, notably in regulating immune-  
59 surveillance and fluid homeostasis<sup>6, 9, 10, 11</sup>.

60 The embryonic origins of PVMs are documented<sup>8, 12</sup>, but surprisingly little is known on  
61 how PVMs are distributed in the brain in postnatal steady-state conditions<sup>9</sup> and whether  
62 their distribution undergoes spatio-temporal changes until adulthood and under  
63 pathophysiological conditions. At the molecular level, PVMs express a set of well-defined  
64 markers, notably CX3CR1, CD206 (also known as MRC1) and lymphatic vessel  
65 endothelial hyaluronan receptor 1 (LYVE-1)<sup>13</sup>. The specificity of LYVE-1 as a PVM marker  
66 was recently demonstrated<sup>14</sup> and the *lyve-1* locus was used to distinguish between a  
67 subset of PVMs and CX3CR1<sup>+</sup> microglia<sup>15</sup>. Although their exact role remains to be  
68 elucidated, LYVE-1<sup>+</sup> PVMs display phagocytic capabilities and have been shown to be  
69 involved in hypertension<sup>13,16</sup>, neuroinflammation<sup>14, 15</sup> and stroke<sup>17</sup>.

70 Currently, characterization of BAMS in general, and PVMs in particular, relies on  
71 enrichment by dissociation, followed by detailed molecular analyses. Although this  
72 approach can reach single-cell sensitivity and is highly informative, it lacks the spatial  
73 dimension since the location of the cells in their native tissues is not preserved. Moreover,  
74 the tissue and organs often need to be pooled in order to increase the quality and quantity  
75 of molecules in the sample. Molecular analyses of smaller regions within the organ or the  
76 tissue are even more challenging for the same reason.

77 Here we study for the first time the distribution of LYVE-1 PVMs at a brain-wide scale by  
78 visualizing them in unprocessed tissue. We used immuno-labeling combined with iDisco  
79 tissue clearing<sup>18</sup> of entire mouse brains to visualize the vasculature that is associated with  
80 LYVE-1<sup>+</sup> PVMs. We examined different developmental postnatal periods from birth until  
81 adulthood, and compared the density of these PVMs in different brain regions. Our results  
82 demonstrate a heterogeneous distribution of LYVE-1<sup>+</sup> PVMs in the brain, and we

83 furthermore find that as the brain ages, the coverage fraction of the brain vasculature by  
84 these PVMs changes as well.

85

## 86 **Materials and Methods**

### 87 **Animals**

88 Male and female *C57Bl/6Nj* mice were purchased from Janvier Laboratories, and  
89 APP/PS1 mice (B6;C3-Tg(APP<sup>swe</sup>,PSEN1<sup>dE9</sup>)85Dbo/Mmjax) were also purchased from  
90 Jackson Laboratories. No selection criteria were used for selecting the animals. The mice  
91 were housed in temperature and humidity controlled rooms, maintained on a 12h/12h  
92 light/dark. All strains were kept in identical housing conditions in pathogen-free facility and  
93 were handled in compliance with regulations of the ethical rules of the French agency for  
94 animal experimentation. Experiments were approved by the French Ministry for Research  
95 and Higher Education's institutional review board (Apafis number: 21814). Mice were  
96 euthanized at various ages ranging from 0-100 weeks of age. The experiments were  
97 performed in accordance with the ARRIVE guidelines. Sample size was chosen in  
98 accordance with similar, previously published experiment.

### 99 **Perfusion and tissue processing**

100 Mice were euthanized with an intraperitoneal (i.p.) injection of 400mg/kg of ketamine  
101 (Imalgene) and 20mg/kg of Xylazine (Rompun) and then intracardially perfused with  
102 0.1M of PBS for 5 min until exsanguination followed by 4% paraformaldehyde (PFA) for  
103 fixation, and the brains were immediately extracted. After extraction, the brain was  
104 immersed in a 4% PFA solution, overnight for 24h at 4°C. The brains were then embedded  
105 in agarose and 100-150  $\mu$ m brain sections were made using a vibration microtome (HM  
106 650 V).

107

108

## 109 **Brain Immunolabeling**

110 Brain sections were incubated with PBS containing 1% Triton-X-100 for 1h at room  
111 temperature (RT), followed by 3 washes (15min each) with PBS containing 10% tris-HCL  
112 PH 7,4, 3% NaCl 5M and 1% Triton-X-100 (TNT). The sections were then blocked with a  
113 blocking solution (TNBT) containing 10% Tris-HCL PH 7,4, 3% NaCl 5M, 1% Triton-X-  
114 100, 0,5% Perking blocking reagent all diluted in H<sub>2</sub>O milliQ QSP. This was then followed  
115 by an overnight incubation at 4°C with appropriately diluted primary antibodies: anti-CD31  
116 (R&D Systems, clone AF3628, 1:250); anti-Lyve-1(ReliaTech GmbH, clone 103-PA50,  
117 1:300), anti-Lyve-1 (eBioscience, ALY7, 1:100), anti-CD206 (Biorad MCA2235T, clone  
118 MR5D3, 1:300), anti-aquaporin 4 (Sigma, A5971, 1:500), anti-ephb4 (R&D Systems,  
119 AF446-SP, 1:100), anti-SMA (Sigma, C6198-2ML, 1 :250). Whole mounts and sections  
120 were then washed 3 times for 15 min at RT with TNT, followed by incubation with Alexa-  
121 fluor 488/555/647 Donkey/ anti rabbit/goat/rat IgG antibodies (Invitrogen, 1:250) for 4h at  
122 RT in TNBT. After 5 min in 1:2000 DAPI reagent, sections were washed 3 times with TNT  
123 and mounted with a fluorescence mounting medium (Dako, S3023) under coverslips.

## 124 **Samples staining and iDISCO+ clearing**

125 Entire mice brains were cleared using the iDisco clearing protocol<sup>18</sup>. For the  
126 immunolabeling step, the brains were incubated for 5-7 days at 37°C with rotation, with  
127 diluted primary antibodies: anti-CD31 (R&D Systems, clone AF3628, 1:400), anti-Lyve-  
128 1(ReliaTech GmbH, clone 103-PA50, 1:330), anti-Ephb4 (R&D Systems, AF446-SP,  
129 1:100). Followed by 4 days incubation at 37°C with rotation, with diluted secondary  
130 antibodies: Alexa-fluor 555/647 Donkey anti Rabbit/Goat IgG antibodies (Invitrogen,  
131 1:400).

132

133 **Brain slices imaging**

134 Images of brain sections were taken using Zeiss Axiozoom apotome, and Zeiss LSM 980  
135 confocal microscope.

136

137 **Light sheet imaging**

138 Brains were imaged either on the Ultramicroscope II (LaVision Bio Tec) or  
139 Ultramicroscope Blaze (Miltenyi Biotec) light-sheet microscope with a 1.0X objective, and  
140 on a light-sheet microscope with a 0.63X objective.

141 **Image processing and quantification method**

142 For figure 1I, using imagej software, a thresholding step was made for both LYVE-1 and  
143 CD206 channel, then both particles were analyzed and the number of count was  
144 extracted.

145 For figure 2, 4 and 5, Imaris software was used to process the brain by extracting in 3D  
146 its different regions (OB, Cortex, Hippocampus, Brainstem and Cerebellum) using contour  
147 surface, that allowed to manually select the brain region contours on 2D slices while  
148 precisely and specifically removing the pial surface. This was followed by a mask step for  
149 the created surface.

150 For the quantification process, the brain vessels and Lyve-1 PVMs were identified,  
151 segmented and measured (area and volume) using Surfaces. The ratio calculated to  
152 generate Lyve-1 PVMs region and age dependent density were:

153  $\left( \frac{\text{Lyve-1 PVMs Total area}}{\text{Pecam-1 Total area}} \right) \times 100$  and  $\left( \frac{\text{Lyve-1 PVMs Total volume}}{\text{Pecam-1 Total volume}} \right) \times 100$

154 For Figure 5, analysis was performed without prior knowledge of group allocation.

155



156 **Statistical analysis**

157 All statistics were conducted using using GraphPad Prism software. Throughout this  
158 article, data are represented as means with standard deviation. For figure 1, a non-  
159 parametric Kruskal-Wallis test was performed followed by a Dunn's multiple comparisons  
160 test. For figure 2 and 4, a parametric one way Anova test was performed followed by  
161 Bonferroni post-hoc test for the mean comparisons between each group. For Figure 5, a  
162 parametric student t-test was used. All sample sizes and p values are indicated in the  
163 figure legends. In all instances, n represents the number of mice used.

164

165

166

167

168

169

170

171

172

173

174

175

176

177

178

179

180 **Results**

181 To learn more about the immediate environment in which brain LYVE-1 PVMs (hereafter  
182 referred to as “BrLyVM”) are situated, we co-immunolabeled PECAM-1 to label the  
183 endothelium and LYVE-1 to label BrLyVMs. LYVE-1 signal did not co-localize with  
184 PECAM-1-labeled endothelium but rather enveloped it, confirming a perivascular  
185 localization of BrLyVM (Figure 1A-B, and Supplementary Video 1). While PVMs and  
186 parenchymal microglia are known to have common molecular markers<sup>19</sup>, BrLyVMs were  
187 elongated and morphologically distinct from microglia, which had a punctate-like staining  
188 pattern, as seen by co-immunolabeling for LYVE-1 and for the microglial marker Iba-1  
189 (Figure 1C). To better understand where in the perivascular space BrLyVMs are situated,  
190 we stained for PECAM-1, LYVE-1 and Aquaporin 4, and found that BrLyVMs were situated  
191 between the endothelium and the glia limitans (Figure 1D). The signal level of the staining  
192 was also measured, confirming the perivascular localization of these BrLyVMs (Figure 1E-  
193 F).

194 The existing uncertainty in the literature regarding the distribution of PVMs around arteries  
195 and veins<sup>9</sup> led us to next ask whether BrLyVMs are found around veins or arteries. We  
196 detected BrLyVMs around veins (Figure 1Gi) by co-labeling for LYVE-1 and for EPHB4,  
197 an established venous marker<sup>20,21</sup>. We used the transgenic mouse reporter line  
198 CONNEXIN-40-GFP<sup>22</sup> (CX40-GFP) in which arterial endothelial cells express the  
199 fluorescent protein GFP. We co-immunolabeled CX40-GFP (GFP positive cells are  
200 displayed in magenta) brain slices for LYVE-1 and found, as previously reported, that  
201 BrLyVMs encircle arteries (Figure 1Gii). BAMs are known to express CD206<sup>23</sup>, also known  
202 as MRC1, but the relative abundance of these two markers in brain tissue has never been  
203 visualized *in situ*. We thus co-immunolabeled brain slices for these two markers (Figure

204 1H) and quantified their relative proportions in five different brain regions. We found that  
205 the ratio of BrLyVMs/CD206<sup>+</sup> PVMs significantly varied between the different regions that  
206 we analyzed. In the olfactory bulb and in the hippocampus there was a significantly higher  
207 percentage of BrLyVMs/CD206<sup>+</sup> PVMs than in the cortex, brainstem and cerebellum  
208 (Figure 1I).

209 Taken together, these results show that BrLyVMs are situated between the endothelial  
210 basement membrane and the glia limitans, which delimits the parenchyma, and  
211 furthermore suggest that they possess unique molecular signatures and spatial  
212 distribution across brain regions.

213 PVMs are not abundant in the brain<sup>8</sup>, and furthermore we noticed that BrLyVMs  
214 abundance in the cortex was sparse and occasionally varied between brain regions (not  
215 shown). This raised the hypothesis that across different brain regions, BrLyVMs may be  
216 associated to different extents with the vasculature, which prompted us to investigate their  
217 heterogeneity at a global brain-wide scale. We used the iDisco tissue-clearing method  
218 that enables to detect and visualize large volumes of tissue at high resolution<sup>18</sup>. We  
219 verified the binding specificity of the LYVE-1 antibody with iDisco (Supplementary Figure  
220 1A), and then co-immunolabeled entire brains with PECAM-1 and LYVE-1 (Figure 2).  
221 Inspection of immuno-labeled cleared cortical tissue revealed that BrLyVMs covered the  
222 endothelium (Figure 2A), in agreement with our results obtained on tissue slices (Figure  
223 1). We further noticed that BrLyVMs encircled the cortical vasculature (hereafter, for the  
224 purpose of readability, we refer to any vessel that is encircled by BrLyVMs as “LYVessel”)  
225 in one of three coverage patterns (Figure 2A). Pattern I (“linear”) refers to vessels that  
226 were typically 10-40 µm microns in diameter and were characterized by a single line of  
227 BrLyVMs around their perimeter (Figure 2A, 2B). Pattern II (“intermediate”) vessels were

228 of 20-100 $\mu$ m diameter, and contained more than one BrLyVM around their cross section  
229 (Figure 2A, 2B). In addition, class II vessels BrLyVMs displayed an irregular cellular  
230 shape. Pattern III (“circumferential”) vessel diameters ranged between 40-225 $\mu$ m, and  
231 showed a higher density of coverage and an irregular cellular shape (Figure 2A, 2B).

232 We were next curious to understand how BrLyVM are distributed in the brain and whether  
233 this distribution is homogenous in nature. Indeed, while examining the cleared  
234 immunolabeled brains we noticed that although the fluorescent signal was not ubiquitous  
235 as that of PECAM-1 (Figure 2C) across the brain, it was nevertheless detectable in  
236 specific regions in the brain (Figure 2C-D). We detected LYVE-1 staining in prominent  
237 brain structures: the cortex, hippocampus, olfactory bulb, cerebellum and brainstem,  
238 indicative of efficient antibody labeling and penetration across the brain. We visually  
239 identified gross-level differences in the labeling distribution (Figure 2E). To learn more  
240 about these differences and about if and how different brain regions differ in BrLyVM  
241 density, we proceeded by quantifying our datasets after removal of pia LYVE-1 signal  
242 (Supplementary Figure 2). We reasoned that in order to exclude anatomical intra-regional  
243 differences in vasculature density, it was necessary to normalize the density of BrLyVMs  
244 to that of the vasculature in each region. We thus calculated the fraction of the vasculature  
245 that is associated with BrLyVMs by normalizing the surface area of LYVE-1 to that of  
246 PECAM-1 in each of the examined regions (see Materials and Methods). We analyzed  
247 the olfactory bulb, cortex, hippocampus, brain stem and cerebellum, and found that  
248 BrLyVM density varied across these regions and was significantly higher in the  
249 hippocampus (Figure 2F).

250 Given that little is known about how BrLyVMs are distributed around the vasculature in  
251 the hippocampus, together with the relatively higher density of hippocampal BrLyVMs that

252 we found (Figure 2), prompted us to examine this region in more detail. We noticed that  
253 hippocampal BrLyVMs were distributed in a stereotypical pattern (Supplementary Video  
254 2). To learn more about this pattern, we first co-stained PECAM-1 and LYVE-1 and  
255 detected a preferential BrLyVMs association to large-caliber hippocampal vessels (Figure  
256 3Ai). We then investigated if in the hippocampus, BrLyVMs are associated with arteries  
257 or veins. We co-labeled for LYVE-1 and for arteries, using either the CX40-GFP transgenic  
258 mouse line (Figure 3Aii) or by co-immunolabeling for smooth-muscle-actin (SMA, also  
259 known as acta2) to detect the arterial wall<sup>24, 25</sup> (Figure 3Aiii). The results showed that in  
260 the hippocampus, BrLyVMs are associated with most if not all arteries. Arrows in Figure  
261 3Aiii indicate LYVE-1 staining that alternates with arteries within the hippocampus. We  
262 reasoned that this staining could be BrLyVMs that are associated with veins, thus to see  
263 whether BrLyVMs are found around hippocampal veins, we analyzed cleared brain  
264 samples co-immunolabeled for LYVE-1 and for EPHB4. We found that and found that  
265 BrLyVMs are also present around large-caliber hippocampal veins (Figure 3B).

266 The heterogeneity that we observed in different brain regions (Figure 2) led us to  
267 hypothesize that BrLyVM are dynamic and spatially-regulated over time. The abundance  
268 of BAMS and of PVMs in different embryonic mouse stages was recently shown to be  
269 developmentally regulated<sup>26</sup>, and we hypothesized that BrLyVMs would display a dynamic  
270 organization from early postnatal stages into adulthood. In order to examine this  
271 hypothesis, we used whole-brain iDisco clearing of entire brains at P0, P10, P22 and P60  
272 (Figure 4A-4F and Supplementary figure 3, Supplementary Figure 4 and Supplementary  
273 Figure 5A-D) and quantified BrLyVMs density as before (Figure 4G, 4H and  
274 Supplementary Figure 5E). We found that at P0, the majority of the LYVE-1 signal was  
275 found in the pia (Figure 4C and Supplementary Video 3). Although LYVessels were

276 generally absent at this stage, we could nevertheless identify some LYVessels, notably in  
277 the brain stem and in the hippocampus (Figure 4C Brainstem, Hippocampus). At P10 and  
278 P22 (Figures 4D and 4E respectively) we saw a significant increase in LYVE-1 signal that  
279 was concomitantly associated with the vasculature, in the examined brain regions (Figure  
280 4G and Supplementary Figures 3, 4 and 5, and Supplementary Video 4). The  
281 quantification revealed that while the density of BrLyVMs in the brainstem and the  
282 cerebellum peaks at around P10, the same density reaches its peak at around P22 in the  
283 other examined regions, namely the olfactory bulb, cortex and hippocampus (Figure 4G-  
284 H and Supplementary Figure 5E). Interestingly, a small but significant decrease in the  
285 density was noted in all regions by P60 (Figures 2F, 4G-H and Supplementary Figure 5E).  
286 The results that we observed during the different developmental stages (Figure 4)  
287 suggested that BrLyVM density and number are not constant but are rather dynamically  
288 regulated in response to the physiological condition and age of the animal. Interestingly,  
289 among the areas investigated, two distinct temporal dynamics were identified, and the  
290 hippocampus showed a BrLyVM density that is significantly higher than the one found in  
291 all other brain areas over time.

292 PVMs in the cortex are known to have a role in regulation of vascular amyloid-beta  
293 plaques deposition<sup>27</sup>. We thus asked whether we could detect alterations in cortical  
294 BrLyVMs density in a mouse model of Alzheimer's Disease (AD), namely the APP/PS1  
295 transgenic line in which amyloid beta plaques develop in the cortex (Supplementary  
296 Figure 6). We performed PECAM-1 and LYVE-1 immunolabeling on entire brains of 700  
297 days-old mice followed by tissue clearing (Figure 5A-C). We quantified BrLyVM density  
298 after normalizing to the density of the vasculature, and found that it was significantly

299 reduced in APP/PS1 mutants compared to their wild type siblings (Figure 5D), indicating  
300 that the population of BrLyVMs is altered in the cortex these mice.

## 301 **Discussion**

302 Here we studied the postnatal distribution of BrLyVMs across the mouse brain by  
303 examining different stages from birth until adulthood. We used a brain-wide visualization  
304 approach that enabled us to efficiently detect the brain endothelium that is associated with  
305 this population of PVMs in intact brains. This methodology proved to be highly reliable and  
306 recapitulated hallmark properties of PVMs, establishing this approach as bona-fide for the  
307 study of BrLyVMs. Our results demonstrate for the first time that BrLyVMs occupy different  
308 proportions of the vasculature in different brain regions. Overall, a small percentage of  
309 brain vasculature is associated with them, although we noticed that some vessels are  
310 encircled for considerable lengths, reaching a few millimeters in certain cases (not  
311 shown). We also find that LYVessels are encircled by BrLyVMs in one of three patterns,  
312 depending on the diameter of the LYVessel. We show that there is a considerable  
313 difference in BrLyVM density during the first postnatal weeks in a brain-region-dependent  
314 manner. BrLyVMs massively populate the brain between P0 to P10, peaking at around  
315 P10 or P20, depending on the brain region. Finally, our results demonstrate a transition  
316 in the density and morphology of BrLyVMs in a pathophysiological mouse model of AD,  
317 in the cortex where amyloid beta plaques develop. Whether plaque deposition is altered  
318 by a diminution of BrLyVMs remain to be deciphered.

319 The anatomical data we obtained support the view that BrLyVMs are not abundant in the  
320 brain<sup>8</sup>, and that they are associated with a small fraction of the vasculature, which  
321 suggests a low density of LYVessels in the brain. This raises the possibility that LYVessels  
322 have a specific signature that renders them different from neighboring non-LYVessels.  
323 This signature could be molecular or functional, or both, and remains to be elucidated, but  
324 in any case, our observations are in agreement with the known diversity of BAMs<sup>28</sup>. Thus



325 it is also likely that different sub-classes of PVMs, as identified by the different markers,  
326 associate with different vessels and that their ensemble yields a more significant coverage  
327 of the vasculature. The variability that we see in the coverage density between different  
328 brain regions is intriguing and is also in-line with previous reports showing that brain  
329 endothelium exhibits considerable molecular and functional heterogeneity between  
330 different brain regions<sup>29,30</sup> and even within-region differences<sup>25, 31</sup>. In this regard, it is  
331 interesting to note that LYVessels can be either arterial or venous. This suggests that  
332 arterial and venous BrLyVMs may be molecularly distinct, in line with the molecular  
333 heterogeneity of arterial and venous endothelial cells<sup>32</sup>.

334 Our samples also enabled us to detect for the first time different coverage patterns in  
335 which BrLyVMs encircle the endothelial wall. The detection of these patterns was possible  
336 because the structural integrity of the vascular tissue remained intact. The patterns we  
337 observed suggest that there are mechanisms that link certain properties of the vessel to  
338 the coverage pattern. Indeed, why a certain pattern is associated with a certain vessel  
339 remains to be explored more in detail, but could be linked to the diameter of the vessel,  
340 to its arterial or venous identity, or to other unknown properties. Nonetheless, this  
341 observation strongly supports an important role for PVMs in contributing to vascular  
342 aspects of brain physiology.

343 We find that at P0, most of the LYVE-1 signal is associated with the pia, although a small  
344 number of LYVessels can be detected in specific brain regions, namely the brain stem  
345 and the hippocampus. Our results are in agreement with low PVM numbers that are found  
346 in E18.5 brains<sup>26</sup>. Between P0 and P10 there is a significant increase in LYVE-1 signal  
347 inside the brain, where the signal is detected in BrLyVMs. This suggests that between  
348 these two time points there is a massive invasion of BrLyVMs into the brain tissue, in a

349 manner that is similar to the way that microglia colonize the brain until the second  
350 postnatal week in mice<sup>33, 34</sup>. From a developmental point of view, our results substantiate  
351 the reported cellular plasticity of BAMs during the first few weeks of postnatal  
352 development<sup>28</sup>.

353 So far, BAMs have been characterized mostly in mice, but also in zebrafish and in non-  
354 human primates (NHP). Zebrafish BAMs comprise mainly MMs<sup>35,36</sup>, and to a lesser extent  
355 PVMs and CPMs<sup>37</sup>. Interestingly, zebrafish BAMs are CD206<sup>+</sup>/LYVE-1<sup>+</sup>, and in NHP,  
356 CD206<sup>+</sup> PVMs respond to viral infections<sup>38, 39</sup>. An across-species molecular and  
357 anatomical comparison of BAMs in general, and of BrLyVMs specifically, is expected to  
358 yield important insights about the evolution and ontogeny of these cells, and about their  
359 functional roles.

360 In conclusion, we provide here evidence to show that BrLyVMs are unevenly distributed  
361 across the brain, and that their distribution changes with age. This population of PVMs is  
362 plastic and dynamic overtime. Taken together with the existing evidence about the role of  
363 PVMs in general and BrLyVMs in particular, we propose that they play a significant role  
364 in brain physiology through currently unidentified interactions with the brain vascular  
365 system.

366

367

368

369

370

371

372

373 **Acknowledgements**

374 The authors would like to thank members of the Brunet lab for technical assistance, Sara  
375 Makhoul for assistance with preparing the schematic illustrations and the Orion imaging  
376 facility, CIRB, for their support with the imaging presented in this article.

377

378 **Funding**

379 This work was funded by Inserm and Agemed. MK is funded by the French Ministry of  
380 Higher Education and Research. GM was funded by College de France and Inserm.

381

382 **Declaration of conflicting interests**

383 The authors declare no potential conflicts of interest with respect to the research,  
384 authorship, and/or publication of this article.

385

386 **Authors' contributions**

387 MK, GM and IB contributed to the conceptualization and experimental design.

388 MK performed experiments and analyzed the data.

389 All authors interpreted the analyzed data.

390 GM drafted the manuscript.

391 All authors edited, revised and approved the final manuscript.

392

393 **Supplementary material**

394 There is supplementary material associated with this article

395

396

397 **References**

- 398 1. Benveniste, H.; Elkin, R.; Heerdt, P.; Koundal, S.; Xue, Y.; Lee, H.; Wardlaw, J.;  
399 Tannenbaum, A., The glymphatic system and its role in cerebral homeostasis. *J Appl Physiol* (1985)  
400 **2020**.
- 401 2. Sweeney, M. D.; Zhao, Z.; Montagne, A.; Nelson, A. R.; Zlokovic, B. V., Blood-Brain Barrier:  
402 From Physiology to Disease and Back. *Physiol Rev* **2019**, *99* (1), 21-78.
- 403 3. Louveau, A.; Smirnov, I.; Keyes, T. J.; Eccles, J. D.; Rouhani, S. J.; Peske, J. D.; Derecki,  
404 N. C.; Castle, D.; Mandell, J. W.; Lee, K. S.; Harris, T. H.; Kipnis, J., Structural and functional  
405 features of central nervous system lymphatic vessels. *Nature* **2015**, *523* (7560), 337-41.
- 406 4. Aspelund, A.; Antila, S.; Proulx, S. T.; Karlsen, T. V.; Karaman, S.; Detmar, M.; Wiig, H.;  
407 Alitalo, K., A dural lymphatic vascular system that drains brain interstitial fluid and  
408 macromolecules. *J Exp Med* **2015**, *212* (7), 991-9.
- 409 5. Iliff, J. J.; Wang, M.; Liao, Y.; Plogg, B. A.; Peng, W.; Gundersen, G. A.; Benveniste, H.;  
410 Vates, G. E.; Deane, R.; Goldman, S. A.; Nagelhus, E. A.; Nedergaard, M., A paravascular pathway  
411 facilitates CSF flow through the brain parenchyma and the clearance of interstitial solutes,  
412 including amyloid  $\beta$ . *Sci Transl Med* **2012**, *4* (147), 147ra111.
- 413 6. Carare, R. O.; Bernardes-Silva, M.; Newman, T. A.; Page, A. M.; Nicoll, J. A.; Perry, V. H.;  
414 Weller, R. O., Solutes, but not cells, drain from the brain parenchyma along basement membranes  
415 of capillaries and arteries: significance for cerebral amyloid angiopathy and neuroimmunology.  
416 *Neuropathol Appl Neurobiol* **2008**, *34* (2), 131-44.
- 417 7. Wardlaw, J. M.; Benveniste, H.; Nedergaard, M.; Zlokovic, B. V.; Mestre, H.; Lee, H.;  
418 Doubal, F. N.; Brown, R.; Ramirez, J.; MacIntosh, B. J.; Tannenbaum, A.; Ballerini, L.; Rungta, R.  
419 L.; Boido, D.; Sweeney, M.; Montagne, A.; Charpak, S.; Joutel, A.; Smith, K. J.; Black, S. E.;  
420 Disease, c. f. t. F. L. T. N. o. E. o. t. R. o. t. P. S. i. C. S. V., Perivascular spaces in the brain: anatomy,  
421 physiology and pathology. *Nat Rev Neurol* **2020**, *16* (3), 137-153.
- 422 8. Prinz, M.; Masuda, T.; Wheeler, M. A.; Quintana, F. J., Microglia and Central Nervous  
423 System-Associated Macrophages-From Origin to Disease Modulation. *Annu Rev Immunol* **2021**.
- 424 9. Ivan, D. C.; Walthert, S.; Berve, K.; Steudler, J.; Locatelli, G., Dwellers and Trespassers:  
425 Mononuclear Phagocytes at the Borders of the Central Nervous System. *Front Immunol* **2020**, *11*,  
426 609921.
- 427 10. Carare, R. O.; Teeling, J. L.; Hawkes, C. A.; Püntener, U.; Weller, R. O.; Nicoll, J. A.; Perry,  
428 V. H., Immune complex formation impairs the elimination of solutes from the brain: implications  
429 for immunotherapy in Alzheimer's disease. *Acta Neuropathol Commun* **2013**, *1*, 48.
- 430 11. Bakker, E. N.; Bacskai, B. J.; Arbel-Ornath, M.; Aldea, R.; Bedussi, B.; Morris, A. W.;  
431 Weller, R. O.; Carare, R. O., Lymphatic Clearance of the Brain: Perivascular, Paravascular and  
432 Significance for Neurodegenerative Diseases. *Cell Mol Neurobiol* **2016**, *36* (2), 181-94.
- 433 12. Lee, E.; Eo, J. C.; Lee, C.; Yu, J. W., Distinct Features of Brain-Resident Macrophages:  
434 Microglia and Non-Parenchymal Brain Macrophages. *Mol Cells* **2021**, *44* (5), 281-291.
- 435 13. Faraco, G.; Park, L.; Anrather, J.; Iadecola, C., Brain perivascular macrophages:  
436 characterization and functional roles in health and disease. *J Mol Med (Berl)* **2017**, *95* (11), 1143-  
437 1152.
- 438 14. Yang, T.; Guo, R.; Zhang, F., Brain perivascular macrophages: Recent advances and  
439 implications in health and diseases. *CNS Neurosci Ther* **2019**, *25* (12), 1318-1328.

- 440 15. Kim, J. S.; Kolesnikov, M.; Peled-Hajaj, S.; Scheyltjens, I.; Xia, Y.; Trzebanski, S.; Haimon,  
441 Z.; Shemer, A.; Lubart, A.; Van Hove, H.; Chappell-Maor, L.; Boura-Halfon, S.; Movahedi, K.;  
442 Blinder, P.; Jung, S., A Binary Cre Transgenic Approach Dissects Microglia and CNS Border-  
443 Associated Macrophages. *Immunity* **2021**, *54* (1), 176-190.e7.
- 444 16. Faraco, G.; Sugiyama, Y.; Lane, D.; Garcia-Bonilla, L.; Chang, H.; Santisteban, M. M.;  
445 Racchumi, G.; Murphy, M.; Van Rooijen, N.; Anrather, J.; Iadecola, C., Perivascular macrophages  
446 mediate the neurovascular and cognitive dysfunction associated with hypertension. *J Clin Invest*  
447 **2016**, *126* (12), 4674-4689.
- 448 17. Pedragosa, J.; Salas-Perdomo, A.; Gallizioli, M.; Cugota, R.; Miró-Mur, F.; Briansó, F.;  
449 Justicia, C.; Pérez-Asensio, F.; Marquez-Kisinousky, L.; Urra, X.; Gieryng, A.; Kaminska, B.;  
450 Chamorro, A.; Planas, A. M., CNS-border associated macrophages respond to acute ischemic  
451 stroke attracting granulocytes and promoting vascular leakage. *Acta Neuropathol Commun* **2018**,  
452 *6* (1), 76.
- 453 18. Renier, N.; Wu, Z.; Simon, D. J.; Yang, J.; Ariel, P.; Tessier-Lavigne, M., iDISCO: a simple,  
454 rapid method to immunolabel large tissue samples for volume imaging. *Cell* **2014**, *159* (4), 896-  
455 910.
- 456 19. Zeisel, A.; Muñoz-Manchado, A. B.; Codeluppi, S.; Lönnerberg, P.; La Manno, G.; Juréus,  
457 A.; Marques, S.; Munguba, H.; He, L.; Betsholtz, C.; Rolny, C.; Castelo-Branco, G.; Hjerling-  
458 Leffler, J.; Linnarsson, S., Brain structure. Cell types in the mouse cortex and hippocampus  
459 revealed by single-cell RNA-seq. *Science* **2015**, *347* (6226), 1138-42.
- 460 20. Wang, H. U.; Chen, Z. F.; Anderson, D. J., Molecular distinction and angiogenic interaction  
461 between embryonic arteries and veins revealed by ephrin-B2 and its receptor Eph-B4. *Cell* **1998**,  
462 *93* (5), 741-53.
- 463 21. Adams, R. H.; Wilkinson, G. A.; Weiss, C.; Diella, F.; Gale, N. W.; Deutsch, U.; Risau, W.;  
464 Klein, R., Roles of ephrinB ligands and EphB receptors in cardiovascular development:  
465 demarcation of arterial/venous domains, vascular morphogenesis, and sprouting angiogenesis.  
466 *Genes Dev* **1999**, *13* (3), 295-306.
- 467 22. Miquerol, L.; Meysen, S.; Mangoni, M.; Bois, P.; van Rijen, H. V.; Abran, P.; Jongsma,  
468 H.; Nargeot, J.; Gros, D., Architectural and functional asymmetry of the His-Purkinje system of  
469 the murine heart. *Cardiovasc Res* **2004**, *63* (1), 77-86.
- 470 23. Lapenna, A.; De Palma, M.; Lewis, C. E., Perivascular macrophages in health and disease.  
471 *Nat Rev Immunol* **2018**, *18* (11), 689-702.
- 472 24. Brunet, I.; Gordon, E.; Han, J.; Cristofaro, B.; Broqueres-You, D.; Liu, C.; Bouvrée, K.;  
473 Zhang, J.; del Toro, R.; Mathivet, T.; Larrivée, B.; Jagu, J.; Pibouin-Fragner, L.; Pardanaud, L.;  
474 Machado, M. J.; Kennedy, T. E.; Zhuang, Z.; Simons, M.; Levy, B. I.; Tessier-Lavigne, M.; Grenz,  
475 A.; Eltzschig, H.; Eichmann, A., Netrin-1 controls sympathetic arterial innervation. *J Clin Invest*  
476 **2014**, *124* (7), 3230-40.
- 477 25. Kirst, C.; Skriabine, S.; Vieites-Prado, A.; Topilko, T.; Bertin, P.; Gerschenfeld, G.; Verny,  
478 F.; Topilko, P.; Michalski, N.; Tessier-Lavigne, M.; Renier, N., Mapping the Fine-Scale  
479 Organization and Plasticity of the Brain Vasculature. *Cell* **2020**, *180* (4), 780-795.e25.
- 480 26. Utz, S. G.; See, P.; Mildenerger, W.; Thion, M. S.; Silvin, A.; Lutz, M.; Ingelfinger, F.;  
481 Rayan, N. A.; Lelios, I.; Buttgereit, A.; Asano, K.; Prabhakar, S.; Garel, S.; Becher, B.; Ginhoux,  
482 F.; Greter, M., Early Fate Defines Microglia and Non-parenchymal Brain Macrophage  
483 Development. *Cell* **2020**, *181* (3), 557-573.e18.

- 484 27. Hawkes, C. A.; McLaurin, J., Selective targeting of perivascular macrophages for clearance  
485 of beta-amyloid in cerebral amyloid angiopathy. *Proc Natl Acad Sci U S A* **2009**, *106* (4), 1261-6.
- 486 28. Van Hove, H.; Martens, L.; Scheyltjens, I.; De Vlaminc, K.; Pombo Antunes, A. R.; De  
487 Prijck, S.; Vandamme, N.; De Schepper, S.; Van Isterdael, G.; Scott, C. L.; Aerts, J.; Berx, G.;  
488 Boeckxstaens, G. E.; Vandenbroucke, R. E.; Vereecke, L.; Moechars, D.; Williams, M.; Van  
489 Ginderachter, J. A.; Saeys, Y.; Movahedi, K., A single-cell atlas of mouse brain macrophages  
490 reveals unique transcriptional identities shaped by ontogeny and tissue environment. *Nat*  
491 *Neurosci* **2019**, *22* (6), 1021-1035.
- 492 29. Saunders, A.; Macosko, E. Z.; Wysoker, A.; Goldman, M.; Krienen, F. M.; de Rivera, H.;  
493 Bien, E.; Baum, M.; Bortolin, L.; Wang, S.; Goeva, A.; Nemes, J.; Kamitaki, N.; Brumbaugh, S.;  
494 Kulp, D.; McCarroll, S. A., Molecular Diversity and Specializations among the Cells of the Adult  
495 Mouse Brain. *Cell* **2018**, *174* (4), 1015-1030.e16.
- 496 30. Schaeffer, S.; Iadecola, C., Revisiting the neurovascular unit. *Nat Neurosci* **2021**.
- 497 31. Pearson-Leary, J.; Eacret, D.; Chen, R.; Takano, H.; Nicholas, B.; Bhatnagar, S.,  
498 Inflammation and vascular remodeling in the ventral hippocampus contributes to vulnerability to  
499 stress. *Transl Psychiatry* **2017**, *7* (6), e1160.
- 500 32. Vanlandewijck, M.; He, L.; Mäe, M. A.; Andrae, J.; Ando, K.; Del Gaudio, F.; Nahar, K.;  
501 Lebouvier, T.; Laviña, B.; Gouveia, L.; Sun, Y.; Raschperger, E.; Räsänen, M.; Zarb, Y.; Mochizuki,  
502 N.; Keller, A.; Lendahl, U.; Betsholtz, C., A molecular atlas of cell types and zonation in the brain  
503 vasculature. *Nature* **2018**, *554* (7693), 475-480.
- 504 33. Arnoux, I.; Hoshiko, M.; Mandavy, L.; Avignone, E.; Yamamoto, N.; Audinat, E., Adaptive  
505 phenotype of microglial cells during the normal postnatal development of the somatosensory  
506 "Barrel" cortex. *Glia* **2013**, *61* (10), 1582-94.
- 507 34. Thion, M. S.; Garel, S., On place and time: microglia in embryonic and perinatal brain  
508 development. *Curr Opin Neurobiol* **2017**, *47*, 121-130.
- 509 35. Venero Galanternik, M.; Castranova, D.; Gore, A. V.; Blewett, N. H.; Jung, H. M.;  
510 Stratman, A. N.; Kirby, M. R.; Iben, J.; Miller, M. F.; Kawakami, K.; Marai, R. J.; Weinstein, B.  
511 M., A novel perivascular cell population in the zebrafish brain. *Elife* **2017**, *6*.
- 512 36. van Lessen, M.; Shibata-Germanos, S.; van Impel, A.; Hawkins, T. A.; Rihel, J.; Schulte-  
513 Merker, S., Intracellular uptake of macromolecules by brain lymphatic endothelial cells during  
514 zebrafish embryonic development. *Elife* **2017**, *6*.
- 515 37. Bower, N. I.; Koltowska, K.; Pichol-Thievend, C.; Virshup, I.; Paterson, S.; Legendijk, A.  
516 K.; Wang, W.; Lindsey, B. W.; Bent, S. J.; Baek, S.; Rondon-Galeano, M.; Hurley, D. G.;  
517 Mochizuki, N.; Simons, C.; Francois, M.; Wells, C. A.; Kaslin, J.; Hogan, B. M., Mural lymphatic  
518 endothelial cells regulate meningeal angiogenesis in the zebrafish. *Nat Neurosci* **2017**, *20* (6), 774-  
519 783.
- 520 38. Holder, G. E.; McGary, C. M.; Johnson, E. M.; Zheng, R.; John, V. T.; Sugimoto, C.; Kuroda,  
521 M. J.; Kim, W. K., Expression of the mannose receptor CD206 in HIV and SIV encephalitis: a  
522 phenotypic switch of brain perivascular macrophages with virus infection. *J Neuroimmune*  
523 *Pharmacol* **2014**, *9* (5), 716-26.
- 524 39. Bohannon, D. G.; Wang, Y.; Reinhart, C. H.; Hattler, J. B.; Luo, J.; Okhravi, H. R.; Zhang, J.;  
525 Li, Q.; Kuroda, M. J.; Kim, J.; Kim, W. K., Perivascular macrophages in the neonatal macaque brain  
526 undergo massive necroptosis after simian immunodeficiency virus infection. *Brain Pathol* **2020**,  
527 *30* (3), 603-613.



528 Figure Legends

529 **Figure 1: Characterization of the vascular environment of BrLyVMs**

530 **(A)** Schematic representation of a brain slice showing the region that was used for  
531 generating the images. **(B)** Immuno-labeling of LYVE-1 (green) and PECAM-1 (magenta)  
532 reveals that BrLyVMs are not part of the endothelium. Scale bar 50 $\mu$ m. **(C)** Immuno-  
533 labeling of LYVE-1 (green) and microglia (IBA1, magenta) demonstrates that BrLyVMs  
534 and microglia are morphologically distinct. Scale bar 50 $\mu$ m. **(D)** BrLyVMs (LYVE-1, green)  
535 are positioned between the endothelium (PECAM-1, magenta) and the glia limitans  
536 (Aquaporin 4, white). **(Di-Div)** Higher magnification of the box highlighted in **(D)**. Scale bar  
537 10 $\mu$ m. **(E)** Graphical representation of the three different markers along the dashed line  
538 shown in **(Di)**. **(F)** Schematic representation of the localization of BrLyVMs in the Virchow-  
539 Robin space. Astrocytes, BrLyVMs and a blood vessel are annotated. **(G)** BrLyVMs  
540 encircle veins (EPHB4, magenta, **Gi**) and arteries (CX40, magenta, **Gii**). Scale bar  
541 100 $\mu$ m. **(H)** Co-immunolabeling for LYVE-1 (green) and CD206 (magenta). Scale bar  
542 100 $\mu$ m. Arrows point to cells that express CD206 but are negative for LYVE-1. **(I)**  
543 Quantification of BrLyVMs as a fraction of CD206<sup>+</sup> PVMs in different brain regions. (mean  
544  $\pm$  SD; n = 3 mice each group; \*p<0.05 Kruskal-Wallis with Dunn's post-hoc test).

545 **Figure 2: The heterogeneity of BrLyVMs distribution and density in the adult mouse**  
546 **brain revealed by tissue clearing.**

547 **(A)** Three dimensional (3D) rendering of a 500 $\mu$ m-thick optical slice of the cortex  
548 immunolabeled for PECAM-1 (magenta) and LYVE-1 (green) after iDisco tissue clearing.  
549 Three different coverage patterns around the endothelium are observed (denoted as I, II  
550 and III on the image). **(B)** Quantification of the three patterns as a function of vessel  
551 diameter. Shown in green are schematic drawings that represent each pattern. n=3 **(C)**

552 3D renderings of dorsal (**i**), lateral (**ii**) and a single-optical slice (**iii**) views of LYVE-1  
553 (green) and PECAM-1 (magenta) wholemount immunolabeling. Scale bar 700 $\mu$ m. (**D**)  
554 Schematic annotated representation of five brain regions shown in color-coded dashed  
555 boxes in (**Ciii**). (**E**) Higher magnification of the boxes highlighted in (**Ciii**) representing  
556 500 $\mu$ m-thick optical slice. Dashed lines encircle the regions that were used for the  
557 analysis. Scale bar 200 $\mu$ m. (**F**) Quantification of LYVE-1 surface area as a fraction of total  
558 PECAM-1 surface area in each region (mean  $\pm$  SD; n = 6 mice each group; \*p<0.05 one-  
559 way ANOVA with Bonferroni post-hoc test).

560

561 **Figure 3: Hippocampal BrLyVMs encircle main arteries and veins.**

562 (**A**) Hippocampal region of brain slices co-immunolabeled for LYVE-1 (green) and  
563 PECAM-1 immunolabeling (magenta, **Ai**), CX40-GFP (magenta, **Aii**) or smooth-muscle-  
564 actin immunolabeling (SMA, magenta, **Aiii**). BrLyVMs encircle large-caliber hippocampal  
565 vessels (white stars, **Ai** top row). Arteries (**Aii**, **Aiii**) are encircled by BrLyVMs. White  
566 arrows (**Aiii**, top row) denote LYVE-1 around veins that are detected as SMA-negative  
567 vessels in between SMA-positive vessels. Scale bar 200 $\mu$ m. (**B**) Immunolabeling of  
568 whole-mount cleared brain tissue for LYVE-1 (green) and EPHB4 (magenta) reveals  
569 large-caliber veins that are encircled by BrLyVMs (scale bar = 200 $\mu$ m).

570

571

572

573

574



575 **Figure 4: BrLyVMs dynamics at different developmental stages revealed by tissue**  
576 **clearing.**

577 **(A)** Schematic representation of the different developmental stages examined. **(B)**  
578 Schematic representation of the different regions that were used for imaging and for  
579 quantification. **(C-F)** Representative 200 $\mu$ m optical-slice dorsal views of LYVE-1 (green)  
580 wholemount immunolabeling of the olfactory bulb, cortex, hippocampus, brainstem and  
581 cerebellum at the different stages. Columns **C, D, E, F** correspond to P0 (scale bar  
582 100 $\mu$ m), P10 (scale bar 200 $\mu$ m), P22 (scale bar = 200 $\mu$ m) and P60 (scale bar = 200 $\mu$ m),  
583 respectively. **(G)** Quantification of LYVE-1 surface area as a fraction of total PECAM-1  
584 surface area in each of the different brain regions at the different developmental stages  
585 (mean  $\pm$  SD; n = 6 mice each group; \*p<0.05 one-way ANOVA with Bonferroni post-hoc  
586 test). **(H)** Representative graph of the BrLyVMs dynamics in each quantified brain region  
587 at the different time points. The peak density in the brain stem and in the cerebellum is  
588 seen at P10, while that of olfactory bulb, cortex and hippocampus is seen at P22.

589  
590 **Figure 5: BrLyVMs density in pathophysiological conditions revealed by tissue**  
591 **clearing.**

592 **(A, B)** Representative 200 $\mu$ m optical slice of LYVE-1 (green) and PECAM-1 (magenta)  
593 wholemount immunolabeling of WT siblings **(A)** and APP/PS1 **(B)** brains at P700,  
594 respectively (dorsal view). Scale bar 1000 $\mu$ m. **(Ai, Aii, Bi, Bii)**- higher magnification of the  
595 boxes highlighted in **(A, B)**, scale bars = 500 $\mu$ m). **(C)** Higher magnification of the boxes  
596 highlighted in Ai and Bi (scale bars = 100 $\mu$ m). **(D)** Quantification of LYVE-1 surface area  
597 as a fraction of total PECAM-1 surface area in the cortex of P700 WT siblings and

598 APP/PS1 mice (mean  $\pm$  SD; n = 6 mice for the WT group and n = 5 for the APP/PS1  
599 group; \*p<0.05 student-t test).

600  
601 **Supplementary Figures**  
602 **Supplementary Figure 1.** A. Three dimensional (3D) rendering of a 500 $\mu$ m-thick optical  
603 slice of the cortex immunolabeled for i. LYVE-1 antibody (green). ii. LYVE-1 isotype  
604 control. iii. LYVE-1 secondary antibody. (scale bar = 500 $\mu$ m). Image intensity was linearly  
605 enhanced post-acquisition in (Aii, Aiii) for visualization purposes.

606 **Supplementary Figure 2.** (A) Manual drawing, using "Contour" on Imaris software, of  
607 the five quantified brain regions (i. Cortex, ii. Hippocampus, iii. Cerebellum, iv. Olfactory  
608 bulb, v. Brainstem) with the removal of the pial surface. (B) Masking of the contoured  
609 surface of i. Cortex, ii. Hippocampus, iii. Cerebellum, iv. Olfactory bulb, v. Brainstem. (C)  
610 The five quantified brain regions without the pial surface.

611 **Supplementary Figure 3.** Representative 200 $\mu$ m optical-slice dorsal views of LYVE-1  
612 (green) and PECAM-1 (magenta) wholemount immunolabeling of the olfactory bulb, and  
613 the cortex at different stages. A. P0 (scale bar 100 $\mu$ m), B. P10 (scale bar 200 $\mu$ m), C. P22  
614 (scale bar 200 $\mu$ m) and D. P60 (scale bar 200 $\mu$ m).

615 **Supplementary Figure 4.** Representative 200 $\mu$ m optical-slice dorsal views of LYVE-1  
616 (green) and PECAM-1 (magenta) wholemount immunolabeling of the Hippocampus, and  
617 the Brainstem at different stages. A. P0 (scale bar 100 $\mu$ m), B. P10 (scale bar 200 $\mu$ m), C.  
618 P22 (scale bar 200 $\mu$ m) and D. P60 (scale bar 200 $\mu$ m).

619 **Supplementary Figure 5.** Representative 200 $\mu$ m optical-slice dorsal views of LYVE-1  
620 (green) and PECAM-1 (magenta) wholemount immunolabeling of the cerebellum at the  
621 different stages. A. P0 (scale bar 100 $\mu$ m), B. P10 (scale bar 200 $\mu$ m), C. P22 (scale bar

622 200 $\mu$ m) and D. P60 (scale bar 200 $\mu$ m). E. Quantification of LYVE-1 surface area as a  
623 fraction of total PECAM-1 surface area at different developmental stages in the different  
624 brain regions (mean  $\pm$  SD; n = 6 mice each group; \*p<0.05 one-way ANOVA with  
625 Bonferroni post-hoc test).

626 **Supplementary Figure 6.** A. Representative figures of Thioflavin S staining in the cortex  
627 of a P700 WT and an APP/PS1 mice siblings (scale bar=100 $\mu$ m). White arrow points to  
628 an amyloid beta in Aii. B. the quantification of the average number of amyloid beta plaques  
629 in the cortex /mm<sup>2</sup>. (n=2 WT mice and n=3 APP/PS1 mice were used).

630

631 Supplementary Videos

632 **Supplementary Video 1.** Three-dimensional animation of a PECAM-1 (magenta)  
633 immunolabeled vessel encircled by BrLyVMs detected with immuno-labeling against  
634 LYVE-1 (green).

635 **Supplementary Video 2.** Three-dimensional animation of a Hippocampus at P60 brain  
636 immunolabeled against LYVE-1 (green).

637 **Supplementary Video 3.** Three-dimensional animation of an entire P0 brain  
638 immunolabeled against LYVE-1 (green). The video zooms on a few BrLyVMs in the  
639 brainstem.

640 **Supplementary Video 4.** Three-dimensional animation of an entire P10 brain  
641 immunolabeled against LYVE-1 (green).

642

643

A

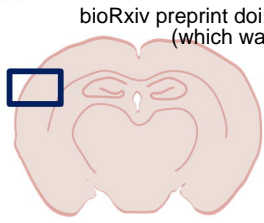

bioRxiv preprint doi: <https://doi.org/10.1101/2021.10.08.463501>; this version posted October 9, 2021. The copyright holder for this preprint (which was not certified by peer review) is the author/funder, who has granted bioRxiv a license to display the preprint in perpetuity. It is made available under aCC-BY-NC-ND 4.0 International license.

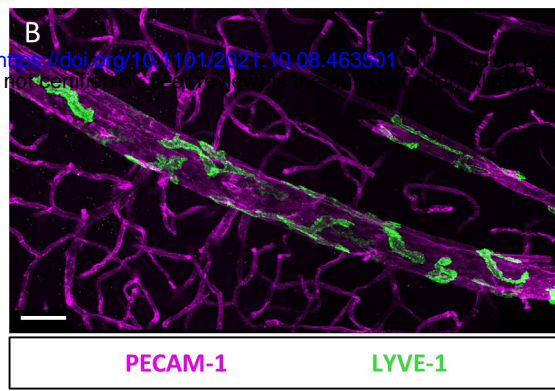

PECAM-1

LYVE-1

C

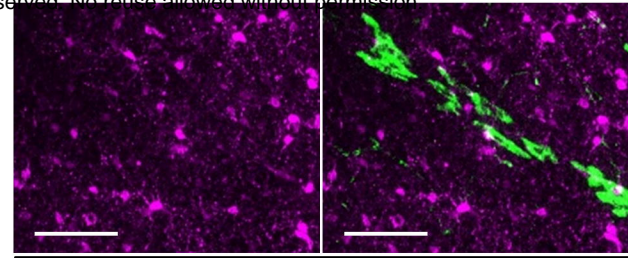

IBA1

LYVE-1

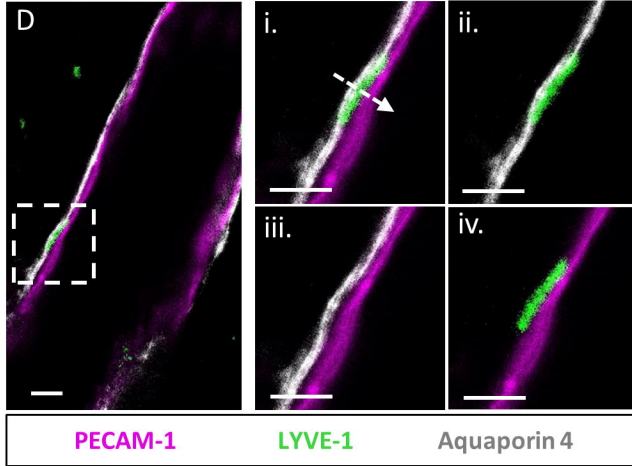

PECAM-1

LYVE-1

Aquaporin 4

E

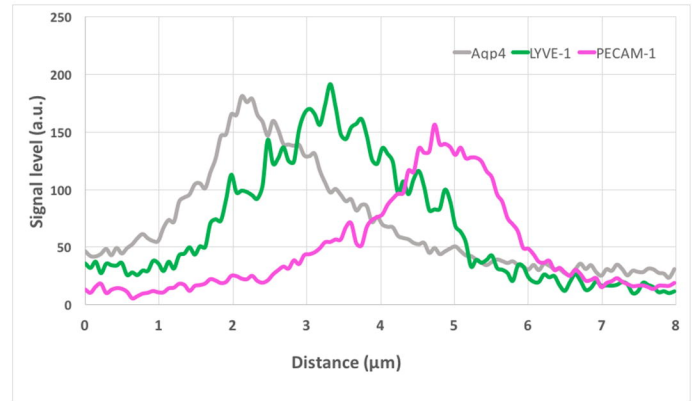

F

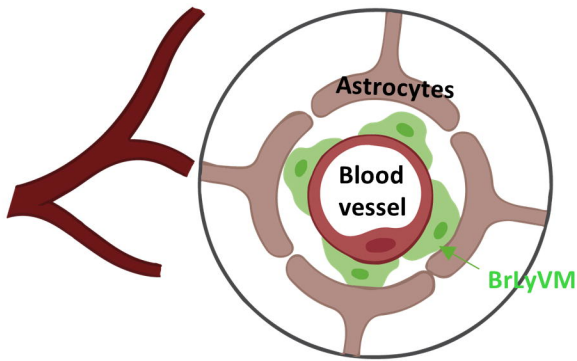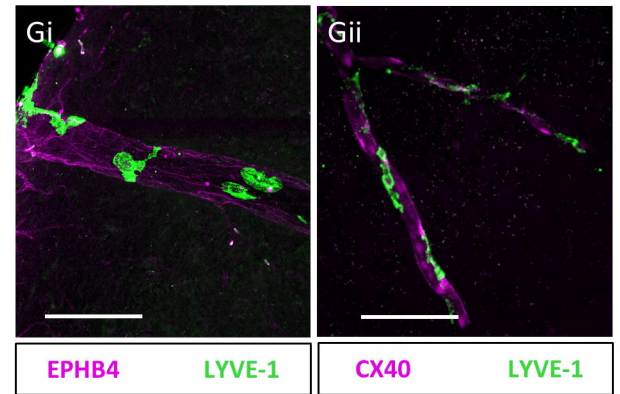

EPHB4

LYVE-1

CX40

LYVE-1

H

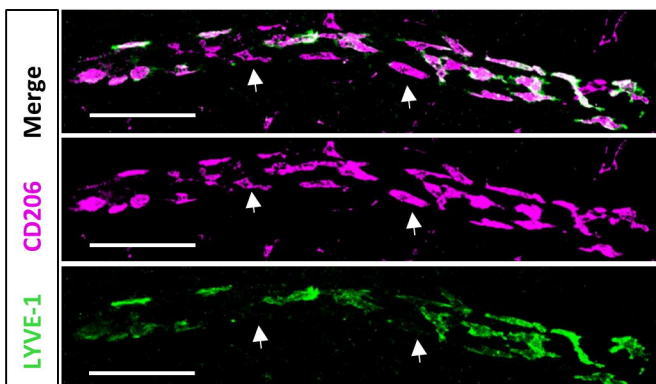

I

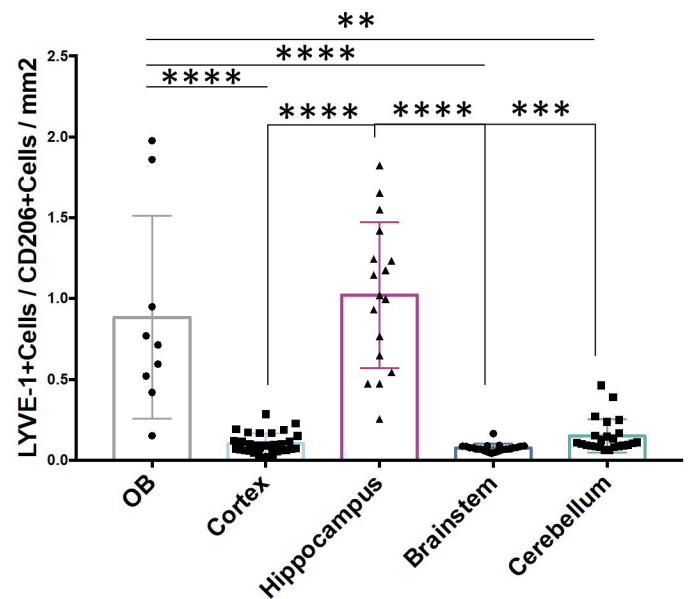



A

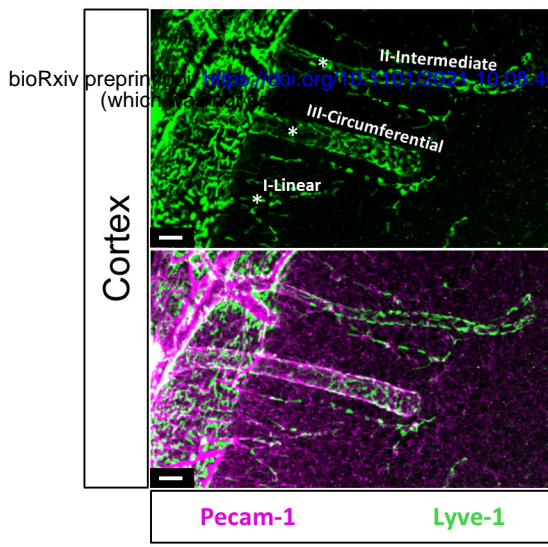

B

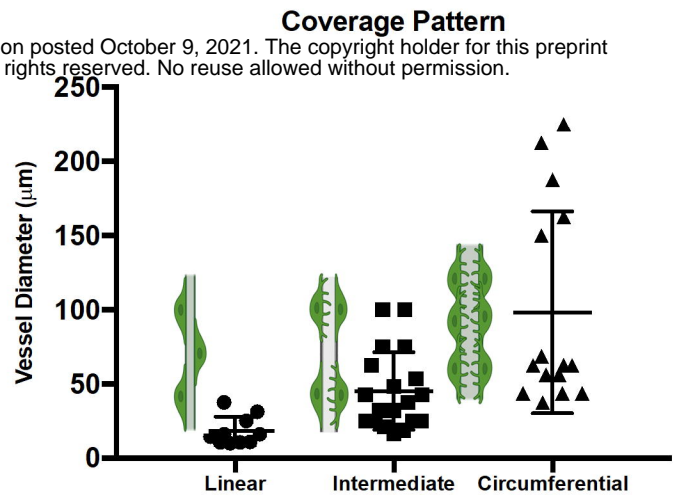

C

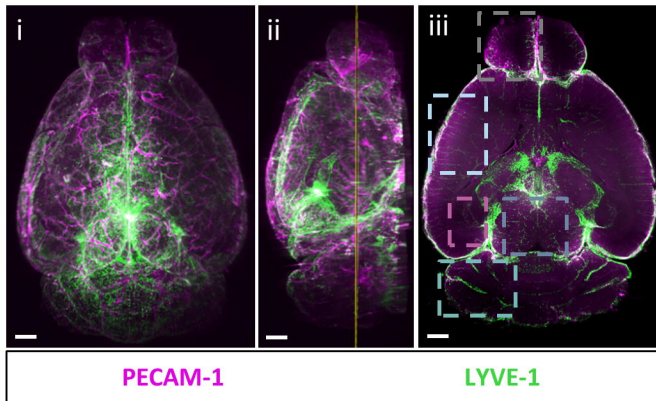

D

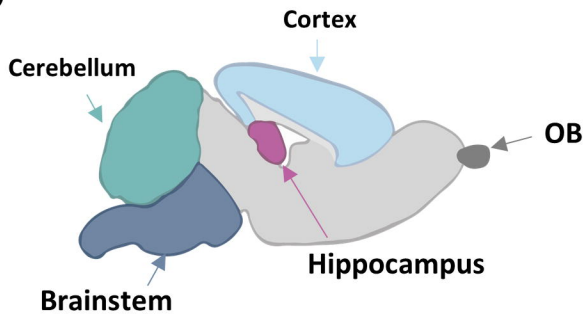

F

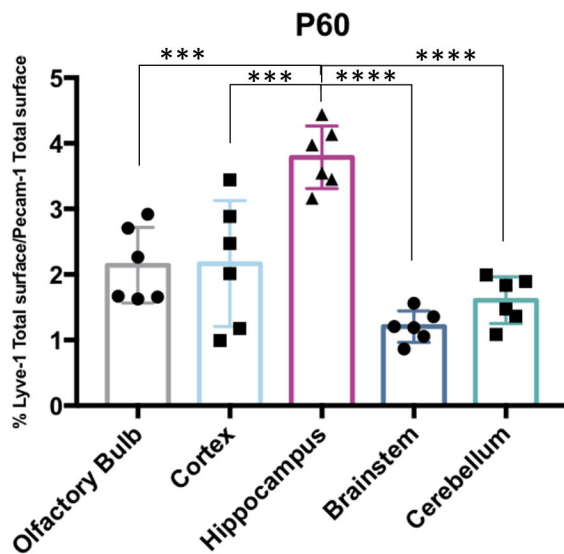

E

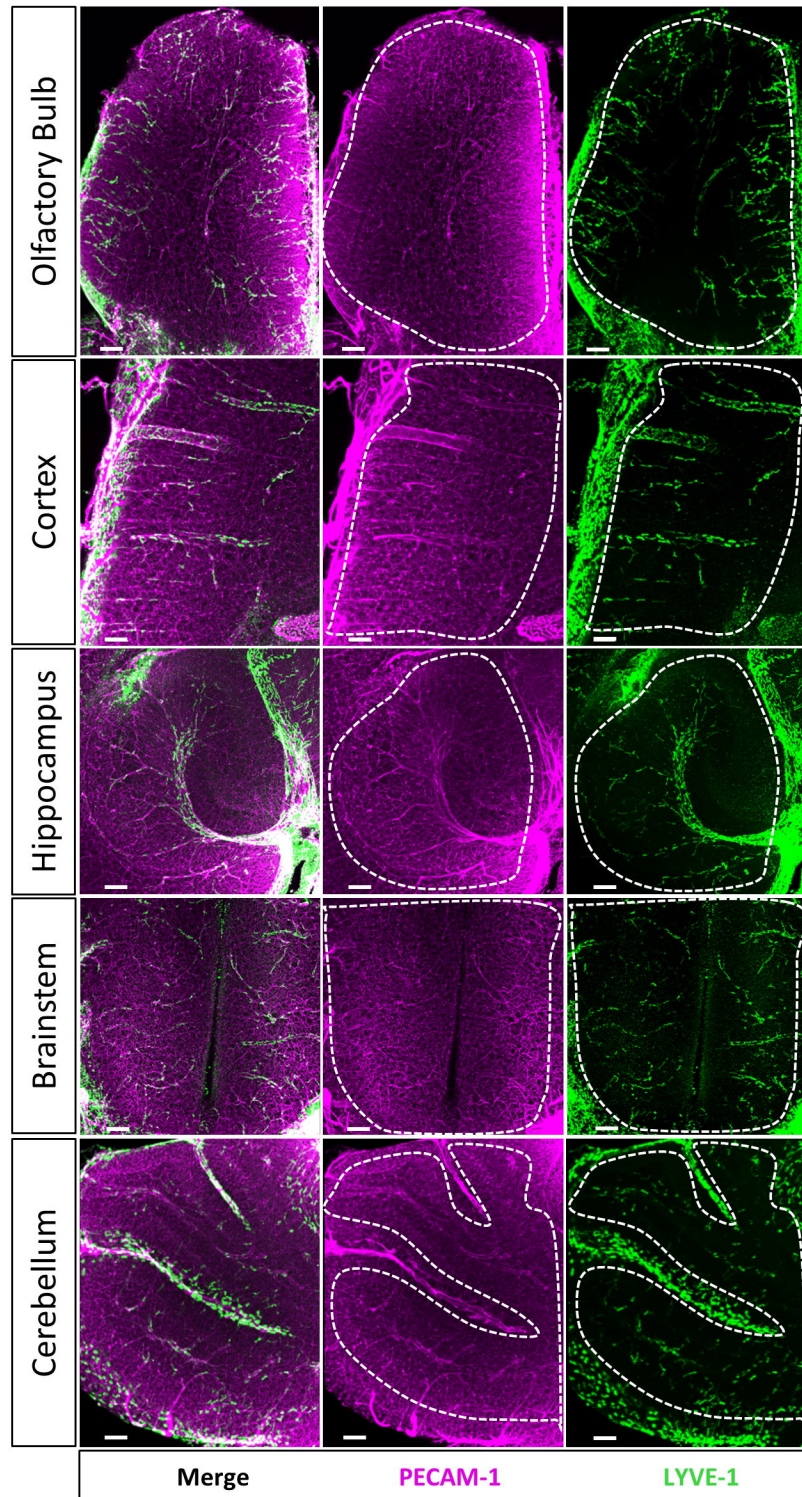



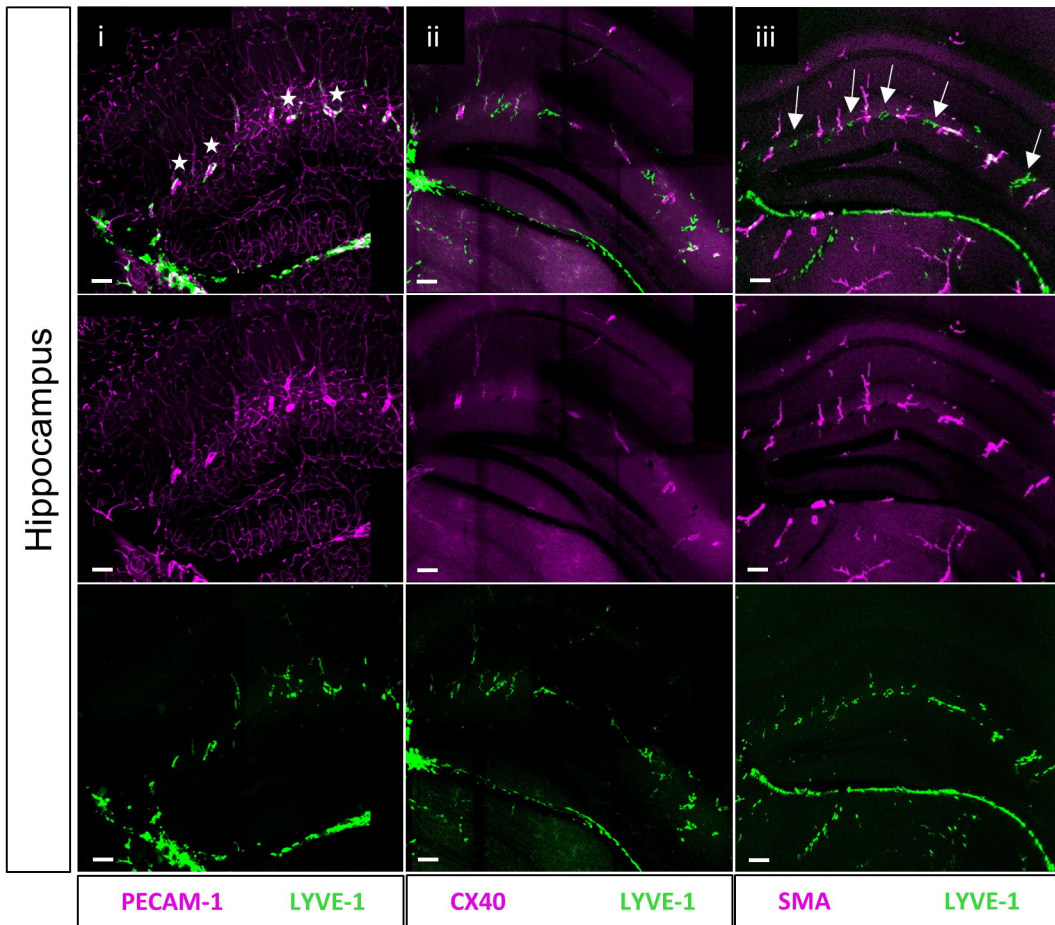

B

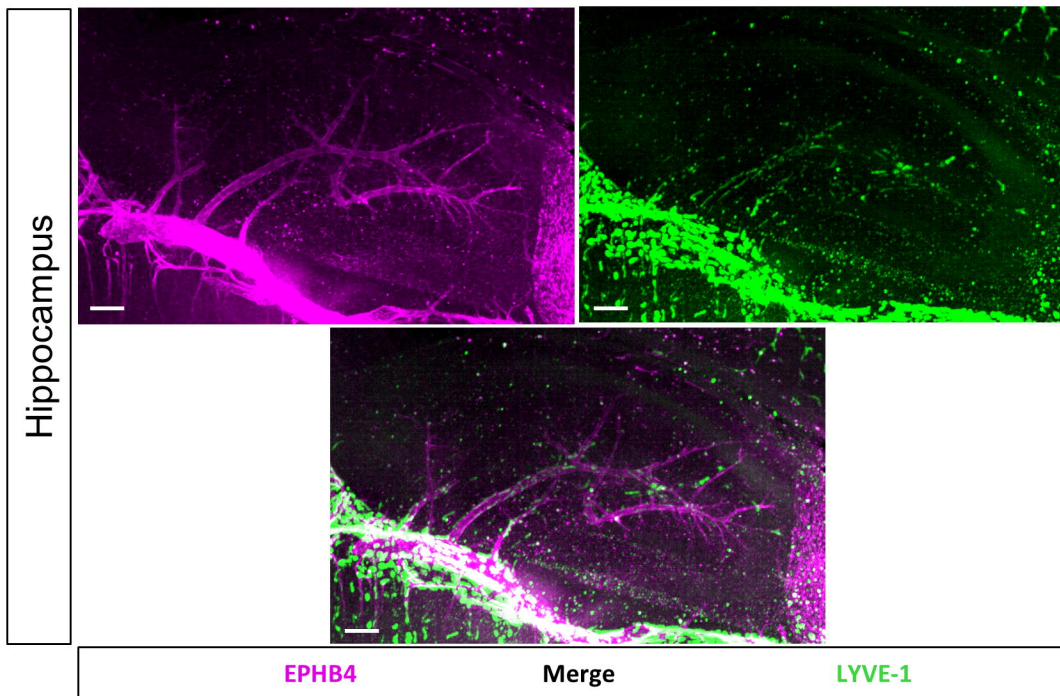

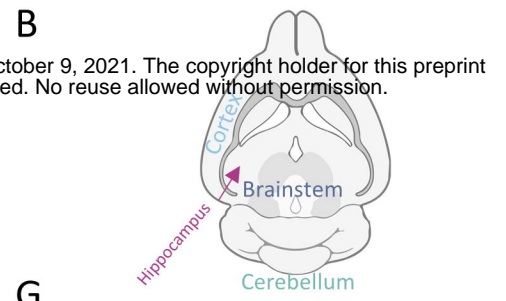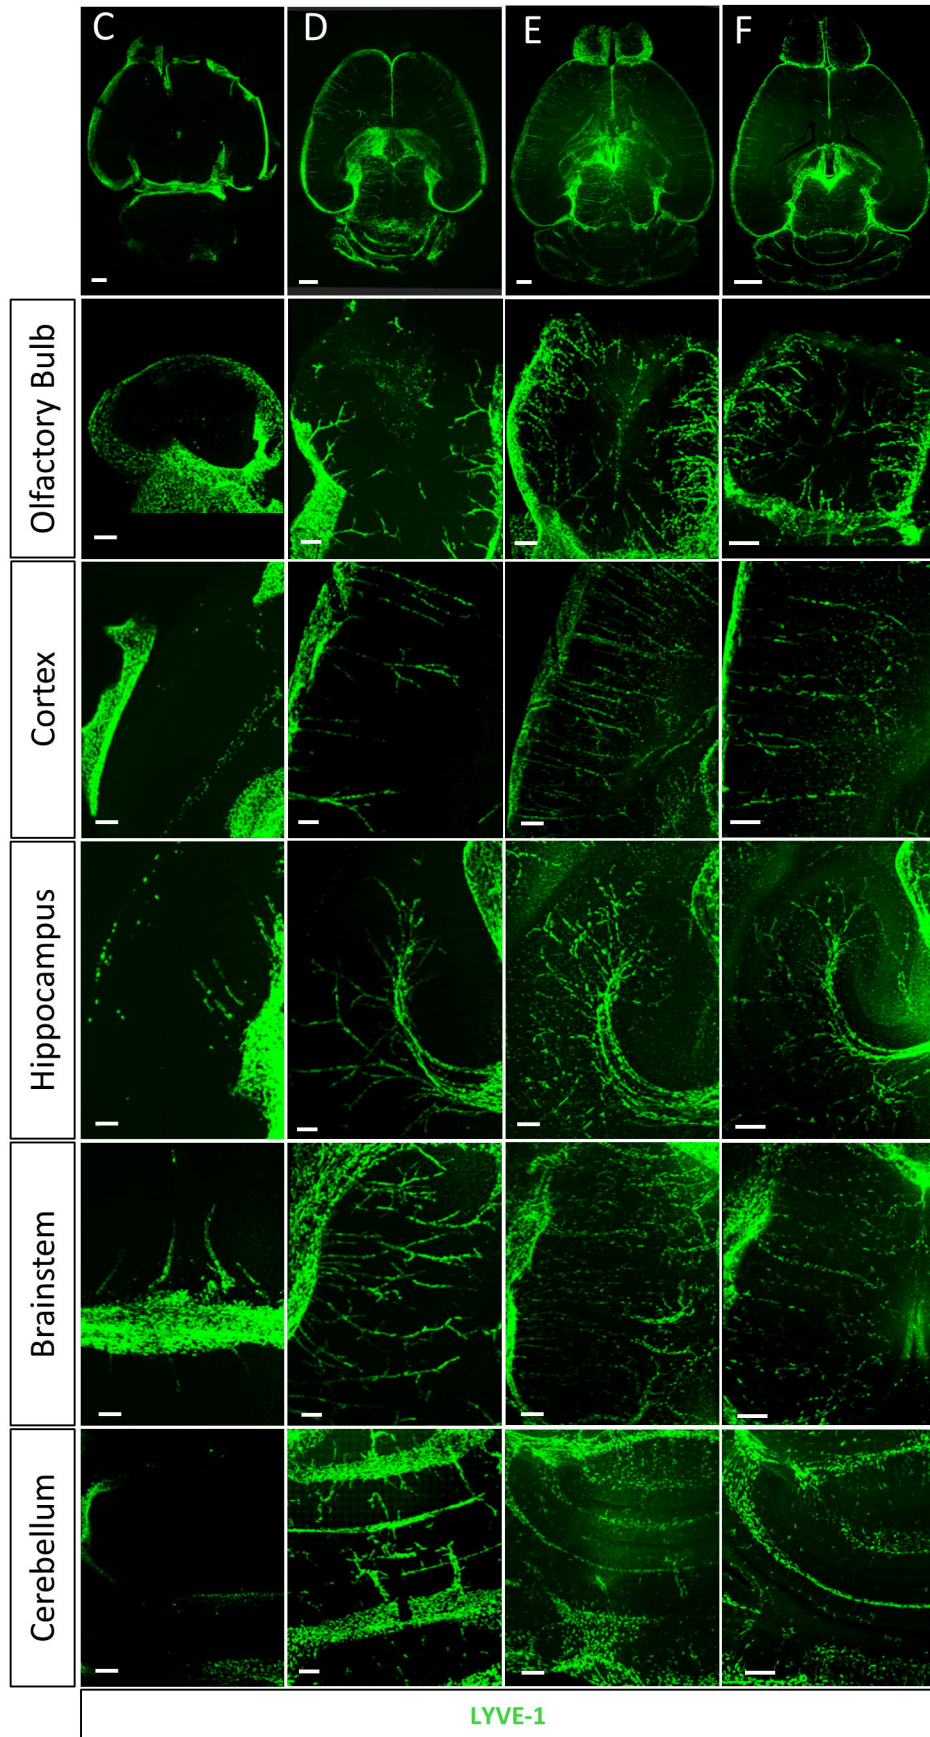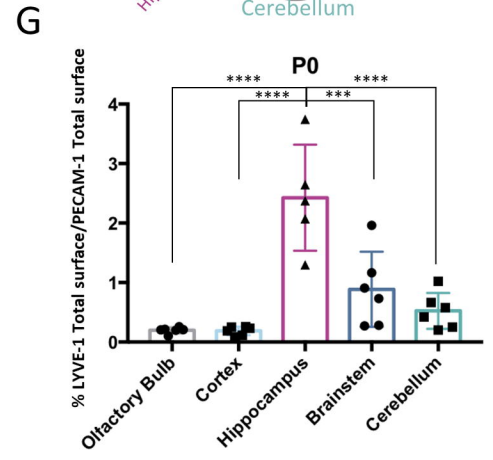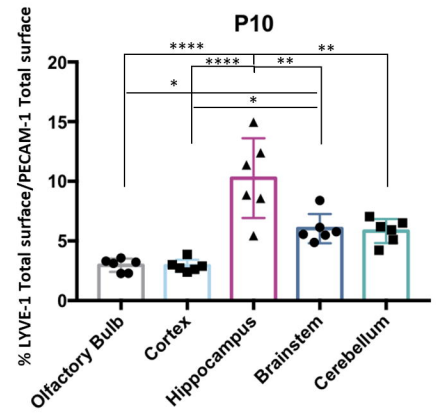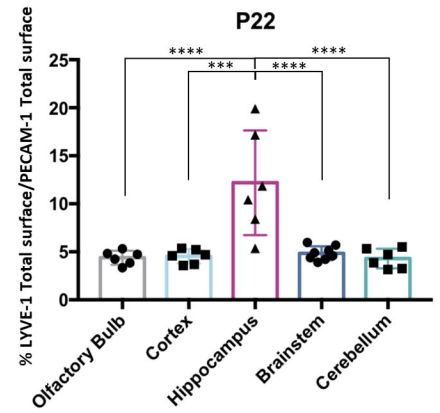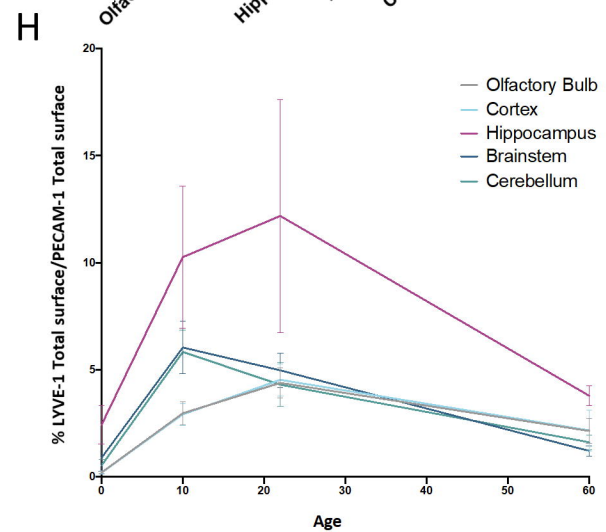



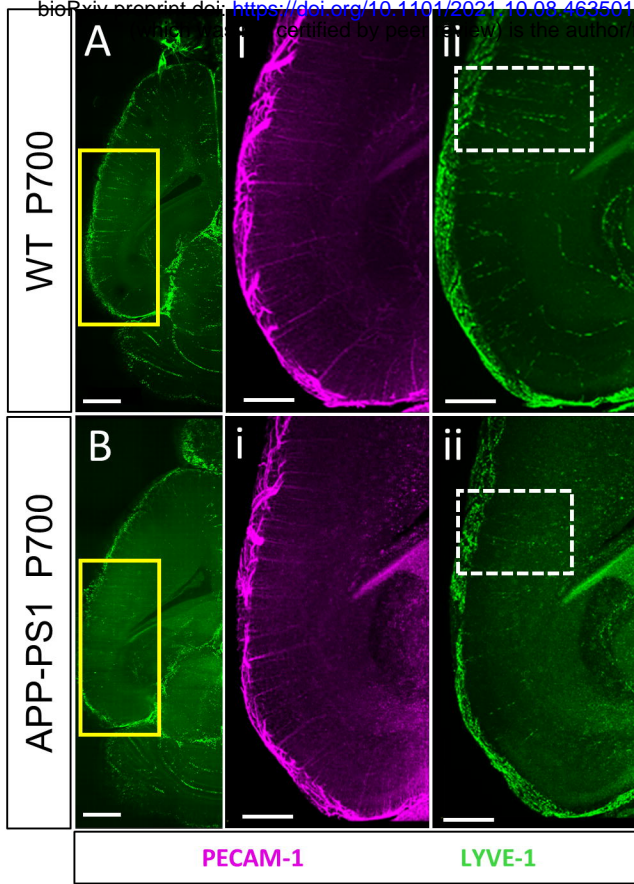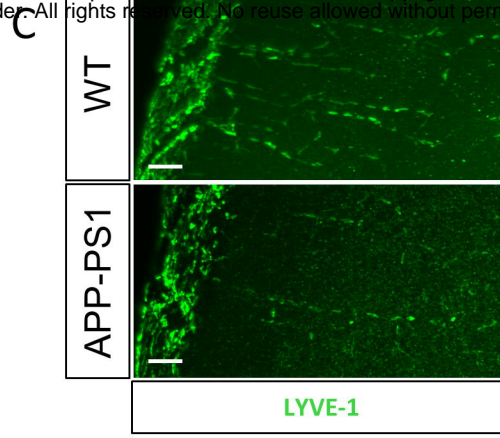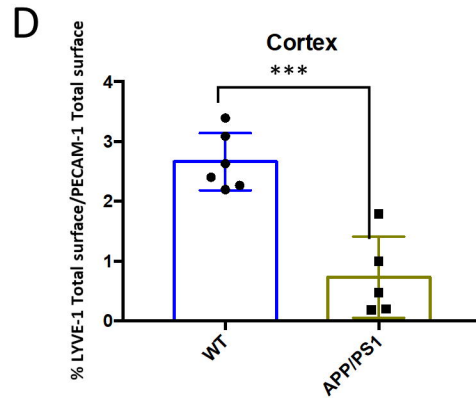

Source: https://www.biorxiv.org/content/10.1101/2021.10.08.463501v1.full.pdf
